# Supplementary material for: SARS-CoV-2 proteins and anti-COVID-19 drugs induce lytic reactivation of an oncogenic virus
Source: PubMed Central journal article supplement (PMC8175744; doi:10.1038/s42003-021-02220-z), 2021-06-03
Supplement: 42003_2021_2220_MOESM2_ESM.pdf [file 42003_2021_2220_MOESM2_ESM.pdf]

## **Description of Additional Supplementary Files**

**File name:** Supplementary Data 1

**Description:** Source data underlying the graphs and charts presented in the main figures.
